# Supplementary material
Source: publisher figshare collection journal article supplement (https://frontiersin.figshare.com/ndownloader/files/25874583)
Supplement: Supplementary file 1 [file 25874583]

## Supplementary Material

# An ordinary differential equation model for simulating local-pH change at electrochemical interfaces

Yoshiharu Mukouyama<sup>1,2</sup> and Shuji Nakanishi<sup>2,3</sup>

<sup>1</sup>Division of Science, College of Science and Engineering, Tokyo Denki University, Hatoyama, Saitama 350-0394, Japan

<sup>2</sup>Research Center for Solar Energy Chemistry, Osaka University, Toyonaka, Osaka 560-8531, Japan

<sup>3</sup>Graduate School of Engineering Science, Osaka University, Toyonaka, Osaka 560-8531, Japan

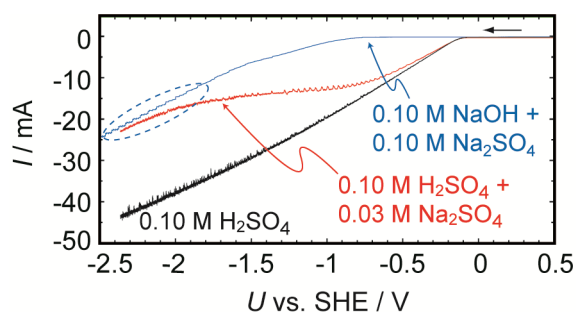

**Figure S1** Current ( $I$ ) - potential ( $U$ ) curves for  $\text{H}_2\text{SO}_4$  and  $\text{NaOH}$  solutions as obtained under controlled potential conditions at a scan rate of  $0.01 \text{ V s}^{-1}$ . The working electrode was a 2 mm diameter Pt disc.

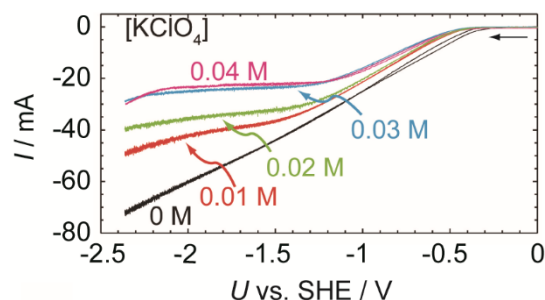

**Figure S2**  $I$  -  $U$  curves for  $0.15 \text{ M HClO}_4 + x \text{ M KClO}_4$  solutions where  $x$  is 0, 0.01, 0.02, 0.03 and 0.04, as obtained under controlled potential conditions at a scan rate of  $0.01 \text{ V s}^{-1}$ . The working electrode was a 4 mm length Au wire (0.5 mm in diameter).

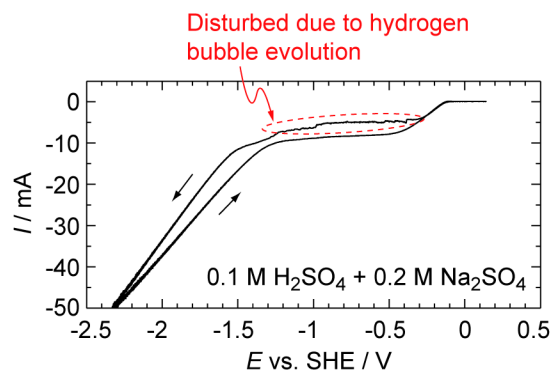

**Figure S3** An  $I - U$  curve for 0.1 M  $\text{H}_2\text{SO}_4$  solution containing 0.2 M  $\text{Na}_2\text{SO}_4$  as obtained under controlled potential conditions at a scan rate of  $0.01 \text{ V s}^{-1}$ . The working electrode was a 4 mm length Pt wire (0.5 mm in diameter).

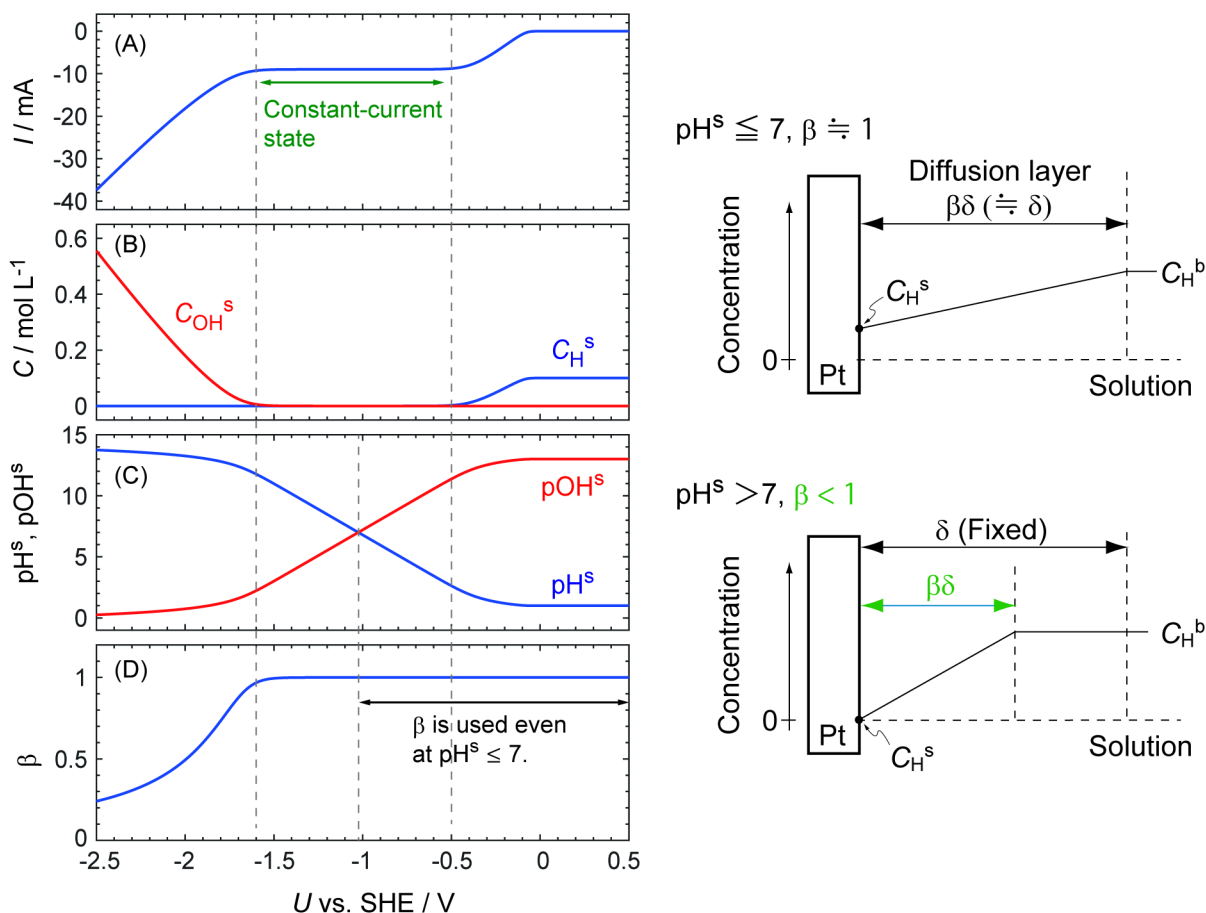

**Figure S4** (left) Simulated curves generated using the same process as described in the caption to Figure 6 except that Eq. 17-2 was used to calculate  $dC_{\text{H}^+}/dt$ . (right) The near-surface concentration profile of  $\text{H}^+$  ions.

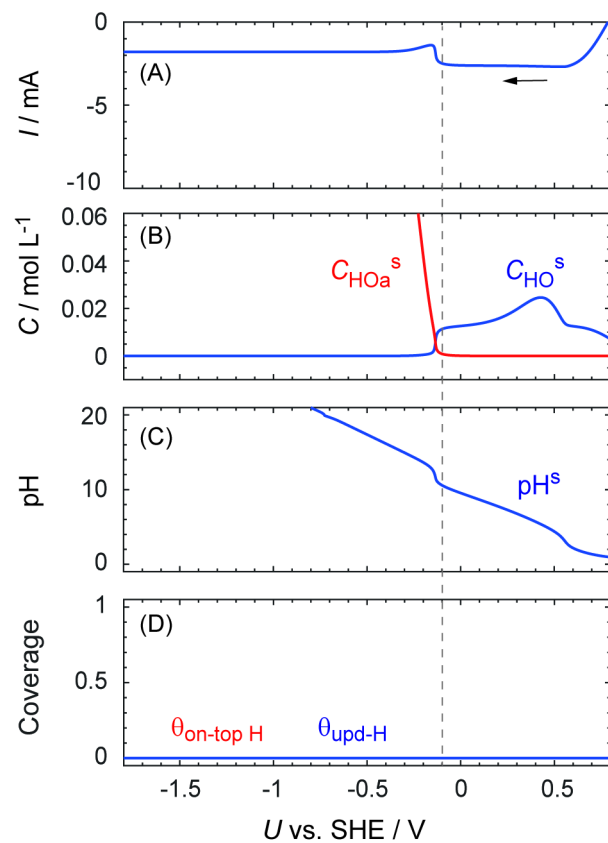

**Figure S5** Simulated curves generated using the same process as described in the caption to Figure 8 except that Eq. 17 was used to calculate  $dC_{\text{H}}^s/dt$ .
